# Supplementary material for: Association of Bolus Feeding With Splanchnic and Cerebral Oxygen Utilization Efficiency Among Premature Infants With Anemia and After Blood Transfusion
Source: PubMed Central journal article supplement (PMC7049081; doi:10.1001/jamanetworkopen.2020.0149), 2020-02-28
Supplement: jamanetwopen-3-e200149-s001.pdf [file jamanetwopen-3-e200149-s001.pdf]

## Supplementary Online Content

Balegar V KK, Jayawardhana M, Martin AJ, de Chazal P, Nanan RKH. Association of bolus feeding with splanchnic and cerebral oxygen utilization efficiency among premature infants with anemia and after blood transfusion. *JAMA Netw Open*. 2020;3(2): e200149. doi:10.1001/jamanetworkopen.2020.0149

**eTable 1.** Splanchnic and Cerebral Oxygen Kinetics in Association With Feeding and Transfusion (N=24)

**eTable 2.** Splanchnic and Cerebral FTOE Estimates From Exploratory Analysis

**e Table 3:** Splanchnic FTOE Estimates From Primary MMRM Model (N=24)

**e Table 4:** Cerebral FTOE Estimates From Primary MMRM Model (N=24)

This supplementary material has been provided by the authors to give readers additional information about their work.

**eTable 1. Splanchnic and Cerebral Oxygen Kinetics in Association With Feeding and Transfusion (N=24)**

| Transfusion epochs | Feeding phases | SpO <sub>2</sub> Mean (SD), % | Splanchnic StO <sub>2</sub> , Mean (SD), % | Cerebral StO <sub>2</sub> , Mean (SD), % |
|--------------------|----------------|-------------------------------|--------------------------------------------|------------------------------------------|
| 0                  | 0              | 96.7 (2.8)                    | 84.8 (6.7)                                 | 71.1 (5.6)                               |
|                    | 1              | 96.2 (2.6)                    | 84.6 (6.9)                                 | 70.3 (6.0)                               |
|                    | 2              | 96.7 (2.1)                    | 83.8 (6.8)                                 | 71.0 (6.2)                               |
|                    | 3              | 96.4 (2.8)                    | 83.7 (6.8)                                 | 71.8 (6.0)                               |
|                    | 4              | 97.2 (1.9)                    | 83.7 (7.1)                                 | 72.1 (5.3)                               |
| 1                  | 0              | 96.1 (1.9)                    | 85.7 (6.1)                                 | 76.3 (3.9)                               |
|                    | 1              | 94.9 (3.4)                    | 83.4 (5.7)                                 | 74.8 (4.8)                               |
|                    | 2              | 96.0 (1.8)                    | 83.8 (5.6)                                 | 75.9 (4.2)                               |
|                    | 3              | 96.3 (1.8)                    | 83.7 (5.3)                                 | 76.6 (3.7)                               |
|                    | 4              | 96.4 (1.8)                    | 83.4 (5.4)                                 | 76.9 (3.7)                               |
| 2                  | 0              | 96.0 (2.2)                    | 85.1 (5.8)                                 | 75.2 (6.7)                               |
|                    | 1              | 95.3 (3.1)                    | 83.6 (4.8)                                 | 75.0 (5.7)                               |
|                    | 2              | 96.4 (2.2)                    | 84.1 (5.1)                                 | 75.3 (4.8)                               |
|                    | 3              | 96.3 (2.4)                    | 84.9 (5.8)                                 | 75.9 (5.2)                               |
|                    | 4              | 95.8 (2.5)                    | 84.4 (5.9)                                 | 75.6 (5.1)                               |
| 3                  | 0              | 96.1 (2.3)                    | 84.0 (7.5)                                 | 74.2 (6.2)                               |
|                    | 1              | 95.8 (2.8)                    | 83.5 (6.8)                                 | 73.4 (6.2)                               |
|                    | 2              | 96.1 (2.5)                    | 83.8 (7.8)                                 | 74.1 (6.0)                               |
|                    | 3              | 96.2 (2.3)                    | 84.3 (8.3)                                 | 74.6 (6.4)                               |
|                    | 4              | 95.7 (2.8)                    | 83.4 (7.5)                                 | 74.3 (6.8)                               |

SpO<sub>2</sub>= pulse oximeter oxygen saturation; StO<sub>2</sub> = tissue oxygen saturation;

**eTable 2. Splanchnic and cerebral FTOE estimates from exploratory analysis**

| TE | FP | Splanchnic FTOE   |               | Cerebral FTOE     |               |
|----|----|-------------------|---------------|-------------------|---------------|
|    |    | [N] Mean (SD), %  | 95% CI, %     | [N] Mean (SD), %  | (95% CI), %   |
| 0  | 0  | [24] 12.06 (7.37) | 8.95 - 15.18  | [24] 26.23 (5.43) | 23.94 - 28.52 |
|    | 1  | [24] 11.68 (7.54) | 8.49 - 14.86  | [24] 26.67 (5.57) | 24.32 - 29.03 |
|    | 2  | [24] 13.01 (6.91) | 10.10 - 15.93 | [24] 26.41 (5.62) | 24.04 - 28.79 |
|    | 3  | [24] 12.92 (6.70) | 10.09 - 15.75 | [24] 25.40 (5.84) | 22.94 - 27.87 |
|    | 4  | [24] 13.59 (7.12) | 10.59 - 16.60 | [24] 25.58 (5.11) | 23.42 - 27.74 |
| 1  | 0  | [22] 10.55 (5.50) | 8.11 - 12.99  | [22] 20.45 (3.04) | 19.11 - 21.80 |
|    | 1  | [22] 11.73 (5.18) | 9.43 - 14.02  | [22] 20.97 (4.14) | 19.14 - 22.81 |
|    | 2  | [22] 12.57 (5.70) | 10.05 - 15.10 | [22] 20.80 (3.74) | 19.14 - 22.46 |
|    | 3  | [22] 12.80 (5.26) | 10.47 - 15.13 | [22] 20.27 (3.31) | 18.80 - 21.74 |
|    | 4  | [22] 13.21 (5.96) | 10.57 - 15.85 | [22] 20.05 (3.50) | 18.50 - 21.60 |
| 2  | 0  | [23] 11.16 (5.46) | 8.80 - 13.52  | [23] 21.46 (6.49) | 18.65 - 24.27 |
|    | 1  | [22] 12.17 (4.24) | 10.29 - 14.04 | [22] 21.49 (5.05) | 19.26 - 23.73 |
|    | 2  | [22] 12.63 (4.54) | 10.62 - 14.64 | [22] 21.96 (4.50) | 19.97 - 23.96 |
|    | 3  | [22] 11.87 (5.11) | 9.61 - 14.14  | [22] 21.41 (4.93) | 19.23 - 23.59 |
|    | 4  | [22] 11.98 (4.94) | 9.79 - 14.17  | [22] 21.35 (4.63) | 19.30 - 23.41 |
| 3  | 0  | [21] 12.79 (7.06) | 9.58 - 16.01  | [21] 23.00 (5.78) | 20.37 - 25.63 |
|    | 1  | [21] 12.55 (6.95) | 9.38 - 15.72  | [21] 23.46 (6.00) | 20.73 - 26.19 |
|    | 2  | [21] 12.85 (7.89) | 9.26 - 16.44  | [21] 23.22 (5.92) | 20.52 - 25.91 |
|    | 3  | [21] 12.53 (8.56) | 8.63 - 16.43  | [21] 22.69 (6.00) | 19.96 - 25.42 |
|    | 4  | [21] 13.09 (7.19) | 9.82 - 16.36  | [21] 22.69 (5.69) | 20.10 - 25.28 |

TE = Transfusion Epoch; FP = Feeding Phase; FTOE = Fractional tissue oxygen extraction; CI – Confidence Intervals

**e Table 3: Splanchnic FTOE estimates from primary MMRM model (N=24)**

|     | TE0                    | TE1                    | TE2                   | TE3                    |
|-----|------------------------|------------------------|-----------------------|------------------------|
| FP0 | 12.06 (9.54 to 14.59)  | 10.47 (7.89 to 13.05)  | 11.00 (8.45 to 13.56) | 13.04 (10.43 to 15.65) |
| FP1 | 11.68 (9.15 to 14.21)  | 11.65 (9.07 to 14.24)  | 12.01 (9.43 to 14.59) | 12.80 (10.19 to 15.41) |
| FP2 | 13.01 (10.48 to 15.54) | 12.50 (9.92 to 15.08)  | 12.47 (9.89 to 15.05) | 13.10 (10.49 to 15.71) |
| FP3 | 12.92 (10.40 to 15.45) | 12.73 (10.15 to 15.31) | 11.72 (9.13 to 14.30) | 12.78 (10.17 to 15.39) |
| FP4 | 13.59 (11.06 to 16.12) | 13.14 (10.56 to 15.72) | 11.82 (9.24 to 14.40) | 13.34 (10.73 to 15.95) |

*P* = 0.97 for the FP-by-TE interaction term.

Values represent mean (95% CI), % for splanchnic FTOE

MMRM = Mixed model for repeated measures

TE = Transfusion Epoch; FP = Feeding Phase; FTOE = Fractional tissue oxygen extraction;

CI – Confidence Intervals

**e Table 4: Cerebral FTOE estimates from primary MMRM model (N=24)**

|     | TE0                    | TE1                    | TE2                    | TE3                    |
|-----|------------------------|------------------------|------------------------|------------------------|
| FP0 | 26.23 (24.14 to 28.31) | 20.48 (18.36 to 22.59) | 21.71 (19.61 to 23.81) | 22.91 (20.77 to 25.04) |
| FP1 | 26.67 (24.59 to 28.76) | 21.00 (18.88 to 23.11) | 21.37 (19.26 to 23.49) | 23.37 (21.24 to 25.50) |
| FP2 | 26.41 (24.33 to 28.50) | 20.82 (18.71 to 22.94) | 21.84 (19.72 to 23.96) | 23.12 (20.99 to 25.26) |
| FP3 | 25.40 (23.32 to 27.49) | 20.29 (18.18 to 22.41) | 21.29 (19.17 to 23.40) | 22.60 (20.47 to 24.73) |
| FP4 | 25.58 (23.49 to 27.66) | 20.07 (17.96 to 22.19) | 21.23 (19.12 to 23.35) | 22.60 (20.46 to 24.73) |

*P* > 0.99 for the FP-by-TE interaction term.

Values represent mean (95% CI), % for cerebral FTOE

MMRM = Mixed model for repeated measures

TE = Transfusion Epoch; FP = Feeding Phase; FTOE = Fractional tissue oxygen extraction;

CI – Confidence Intervals
